# Supplementary material for: Real-World Anticoagulatory Treatment After Transcatheter Aortic Valve Replacement: A Retrospective, Observational Study on 4,800 Patients
Source: Frontiers journal article supplement (doi:10.3389/fcvm.2021.780762), 2021-12-23
Supplement: Table_2.pdf [file Table_2.pdf]

**Supplementary Table 2:** Event numbers and rates (per 100 person-years) of efficacy and safety endpoints < 30 days after procedure according to post-TAVR anticoagulant treatment.

|                                                                                         | < 30 days after procedure |            |          |            |          |            |          |            |            |            |                    |            |
|-----------------------------------------------------------------------------------------|---------------------------|------------|----------|------------|----------|------------|----------|------------|------------|------------|--------------------|------------|
|                                                                                         | Monotherapy               |            | DAPT     |            | OAC mono |            | OAC duo  |            | OAC triple |            | No anticoagulation |            |
|                                                                                         | N events                  | Event rate | N events | Event rate | N events | Event rate | N events | Event rate | N events   | Event rate | N events           | Event rate |
| <b>Ischemic stroke/SE</b>                                                               | 7                         | 1.0        | < 5      | n.a.       | 5        | 1.6        | 8        | 2.0        | < 5        | n.a.       | 10                 | 2.2        |
| <b>Mechanical complication by artificial heart valve</b>                                | < 5                       | n.a.       | < 5      | n.a.       | < 5      | n.a.       | < 5      | n.a.       | < 5        | n.a.       | < 5                | n.a.       |
| <b>MACE</b>                                                                             | 9                         | 1.3        | < 5      | n.a.       | 6        | 2.0        | 9        | 2.2        | < 5        | n.a.       | 11                 | 2.5        |
| <b>Combined bleeding endpoint (intracranial/extracranial/gastrointestinal bleeding)</b> | 12                        | 1.8        | < 5      | n.a.       | 6        | 2.0        | 12       | 3.0        | < 5        | n.a.       | 9                  | 2.0        |

DAPT, dual antiplatelet therapy; MACE, major adverse cardiac event; OAC, oral anticoagulation; SE, systemic embolism
